# Supplementary material for: Leaf-like copper oxide mesocrystals by collagen-assisted biomineralization show attractive biofunctional and electrochemical properties
Source: Royal Society of Chemistry journal article supplement (doi:10.1039/d1ma00788b), 2021-10-05
Supplement: d1ma00788b1.pdf [file d1ma00788b1.pdf]

## Supporting information

### Leaf-like copper oxide mesocrystals by collagen-assisted biomineralization show attractive biofunctional and electrochemical performance

Huixia He, Wenyu Wei, Yongling An, Jinkui Feng, Jianxi Xiao

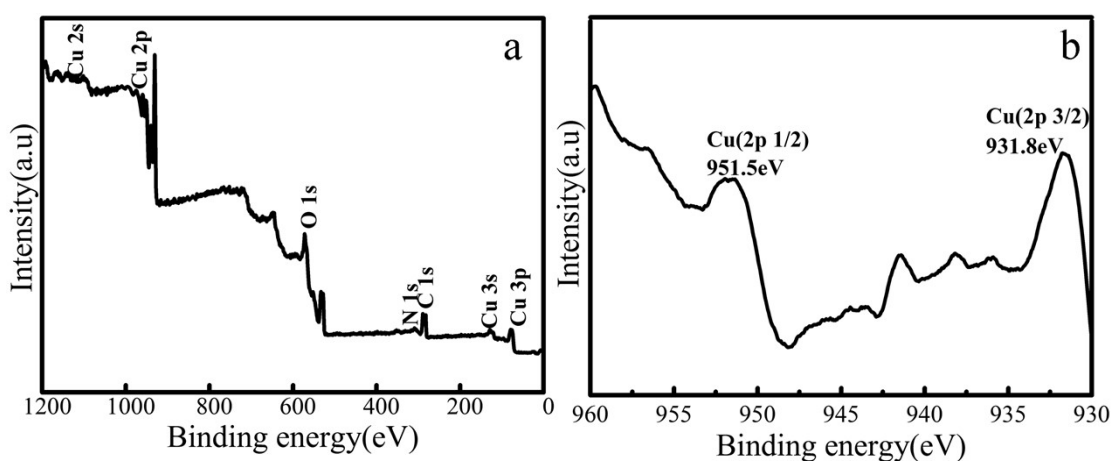

**Figure S1.** XPS spectra of the as-prepared CuO samples obtained after 12 hrs via collagen-templated biomineralization ([collagen] = 0.5 wt %, [Cu(II)] = 0.02 mol/L). (a). Survey spectrum; (b). High-resolution Cu 2p spectrum.

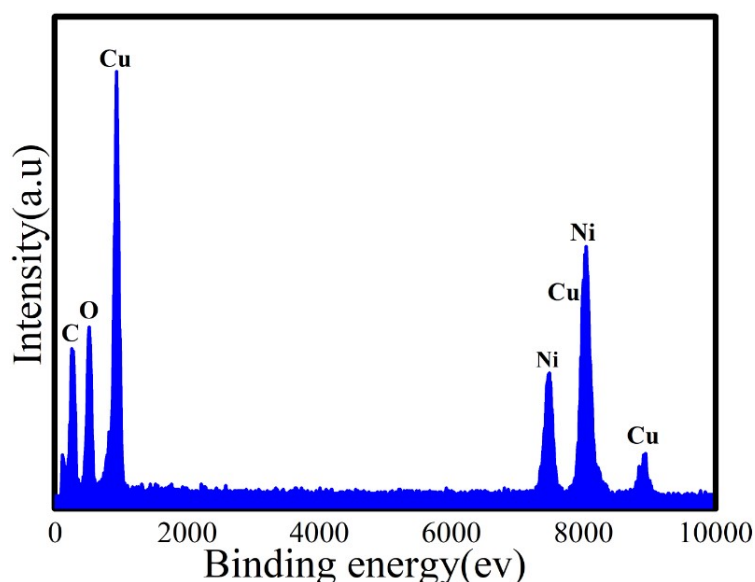

**Figure S2.** EDX spectrum the as-prepared CuO samples obtained after 12 hrs via collagen-templated biomineralization ([collagen] = 0.5 wt %, [Cu(II)] = 0.02 mol/L).

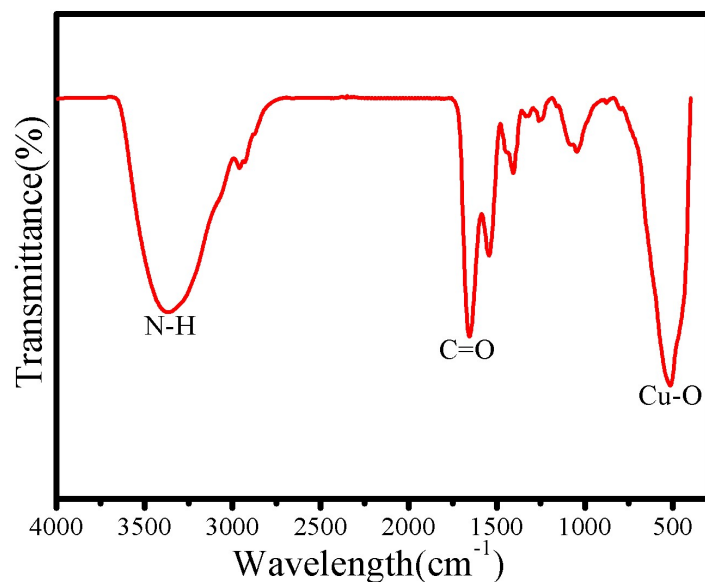

**Figure S3.** FT-IR spectrum of the as-prepared CuO samples obtained after 12 hrs via collagen-templated biomineralization ([collagen] = 0.5 wt %, [Cu(II)] = 0.02 mol/L).

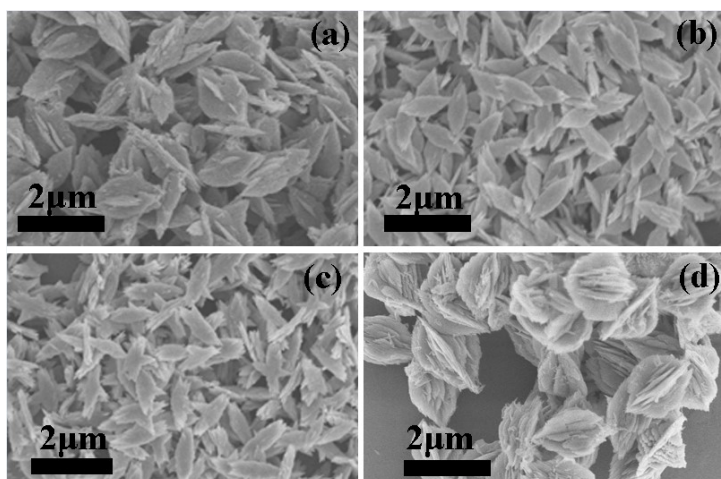

**Figure S4.** FESEM images of CuO nanocrystals obtained after 12 hrs via collagen-templated biomineralization with a constant concentration of collagen ([collagen] = 0.1 wt %) and various concentrations of Cu<sup>2+</sup>: (a) 0.01 mol/L, (b) 0.02 mol/L, (c) 0.03 mol/L, (d) 0.1 mol/L.

**Table S1.** Comparison of the electrochemical performance of CuO nanomaterials as anodes.

| Materials                 | First discharge capacity | Reversible capacity | Cycle performance                   | Initial coulombic efficiency | Ref.      |
|---------------------------|--------------------------|---------------------|-------------------------------------|------------------------------|-----------|
| Bundle-like CuO           | 1179mAh/g (0.3C)         | 800mAh/g            | 666mAh/g (0.3C 50th)                | 67.85%                       | 1         |
| Almonds-like CuO          | 1200mAh/g (0.3C)         | 820mAh/g            | 590mAh/g (0.3C 50th)                | 68.33%                       | 2         |
| CuO microspheres          | 860mAh/g (0.1C)          | 500mAh/g            | 500mAh/g (0.1C 25th)                | 58.12%                       | 3         |
| leaf-like CuO nanoplate   | 1094.7mAh/g              | 661.9mAh/g          | /                                   | 59.5%                        | 4         |
| CuO microspheres          | 967.1mAh/g (0.1C)        | 601.6mAh/g          | 569.8mAh/g (0.1C 50th)              | 62.2%                        | 5         |
| CuO microspheres          | 1063.9mAh/g (0.1C)       | 589.6mAh/g          | 429mAh/g (0.1C 50th)                | 62.4%                        | 6         |
| CuO nanorods              | /                        | /                   | 654 mAh/g (0.5C 200 <sup>th</sup> ) | 97%                          | 7         |
| CuO nanosheets            |                          | 467mAh/g            | 442 mAh/g                           | 60%                          | 8         |
| CuO nanoparticle          | 1196mAh/g (0.5C)         | /                   | 540mAh/g (0.5C 100 <sup>th</sup> )  | /                            | 9         |
| leaf-like CuO             | 880 mAh/g                | 648.6mAh/g          | 694.7mAh/g                          | 73.7%                        | 10        |
| leaf-like CuO             | 1002.4 mAh/g (0.1C)      | 563.8mAh/g          | 421mAh/g (0.1 C 55 <sup>th</sup> )  | 72.7 %                       | 11        |
| needle-like CuO           | 1047mAh/g                | /                   |                                     | 65%                          | 12        |
| Lotus leaf-like structure | 1369mAh/g (0.2C)         | 1041mAh/g           | 910mAh/g (0.2C 80 <sup>th</sup> )   | 76%                          | This work |

#### Reference

1. L. L. Wang, W. Cheng, H. X. Gong, C. H. Wang, D. Wang, K. B. Tang and Y. T. Qian, *J. Mater. Chem.*, 2012, 22, 11297-11302.
2. X. Fei, Z. Shao and X. Chen, *Nanoscale*, 2013, 5, 7991-7997.
3. S. F. Zheng, J. S. Hu, L. S. Zhong, W. G. Song, L. J. Wan and G. Y. Guo, *Chem.*

- 
- Mater*, 2008, **20**, 3617–3622.
4. Z. Li, G. Y. Li, W. Y. Xu, M. J. Zhou, C. X. Xu, M. T. Shi, F. Y. Li, L. Chen and B. H. He, *ChemElectroChem*, 2018.
  5. Z. Zhang, H. Chen, B. X. She, J. Sun, J. Teo and F. Su, *J. Power Sources*, 2012, **217**, 336-344.
  6. C. Wang, D. Higgins, F. Wang, D. Li, R. Liu, G. Xia, N. Li, Q. Li, H. Xu and G. Wu, *Nano Energy*, 2014, **9**, 334-344.
  7. L. L. Wang, H. X. Gong, C. H. Wang, D. Wang, K. B. Tang and Y. T. Qian, *Nanoscale*, 2012, **4**, 6850.
  8. Y. Liu, Y. Qiao, W. X. Zhang, P. Hu, C. J. Chen, Z. Li, L. X. Yuan, X. L. Hu and Y. H. Huang, *Journal of Alloys and Compounds*, 2014, **586** 208–215.
  9. L. L. Wang, K. B. Tang, M. Zhang, X. Z. Zhang and J. L. Xu, *Functional Materials Letters*, 2014, **7**, 1440008
  10. Z. C. Bai, Y. W. Zhang, Y. H. Zhang, C. L. Guo and B. Tang, *Electrochimica Acta* 2015, **159** 29–34.
  11. C. Wang, Q. Li, F. Wang, G. Xia, R. Liu, D. Li, J. S. Spendelow and G. Wu, *ACS Appl. Mater. Interfaces*, 2013, **6**, 1243-1250.
  12. J. Y. Xiang, P. J. Tu, L. Zhang, Y. Zhou, L. X. Wang and J. S. Shi, *Electrochim. Acta*, 2010, **55**, 1820-1824.
